# Supplementary material
Source: publisher figshare collection journal article supplement (https://geolsoc.figshare.com/ndownloader/files/14358605)
Supplement: Supplementary file 1 [file 14358605]

## Sheet: Sheet1
Table S3 Sandstone chemistry ch. 10 Wooded Peak Fm. XRF
Sample name	NZ13-262		NZ13-289	NZ13-291	NZ13-293	NZ13-294	NZ13-295	NZ13-296		N14-193	N14-195		NZ13-189		NZ13-53	NZ13-61	NZ13-62	N14-99	N14-100	N14-101	N14-103	N14-104
Rock type	Siltstone		sandstone	sandstone	med. Sandstone	fine sandstone	med. Sanstone	sandstone		med. Sandstone	fine sandstone		med. Sandstone		dark sandstone	dark sandstone	mudstone	med. sandstone	med. sandstone	med. sandstone	red sandstone	med. sandstone
Region	Maitai River		United Creek (Roding River)	United Creek (Roding River)	United Creek (Roding River)	United Creek (Roding River)	United Creek (Roding River)	United Creek (Roding River)	Champion Creek (Roding River)	Champion Creek (Roding River)	Champion Creek (Roding River)		Key Summit, Alpine area		West Dome, Southland	West Dome, Southland	West Dome, Southland	West Dome, Southland	West Dome, Southland	West Dome, Southland	West Dome, Southland	West Dome, Southland
GPS	S41 30155 E173 38400		S41 36180 E173 30194	S41 36145 E173 30187	S41 35971 E173 29980	S41 35971 E173 29980	S41 35916 E173 29964	S41 35866 E173 29882		E25 33712 N59 82072	E25 33712 N59 82072		S44 81364 E168 13740		S45 60170 E168 23664	S45 60115 E168 23357	S45 60076 E168 23348	E21 38490 N55 01050	E21 38517 N55 01118	E21 38534 N55 01139	E21 38240 N55 04444	E21 38225 N55 01150
Major Elements
SiO2	16.4832		53.154	24.6949	60.7503	71.28	49.8974	66.2998		33.4765	55.77		14.4738		53.72	46.1194	57.9382	70.7943	54.3312	54.153	64.6767	45.2213
Al2O3	3.3762		15.39	6.9629	13.9849	13.45	12.2916	14.6261		8.9043	16.81		3.2232		13.38	15.9594	16.2408	13.4524	17.7903	13.0086	15.0579	13.4256
Fe2O3	1.1628		6.957	3.5119	4.39497	4.22	3.88745	3.70475		4.1406	8.2		1.4892		11.76	11.8891	8.00985	3.8208	7.6428	12.8304	6.8508	10.7069
MgO	0.2856		2.295	1.91835	1.54811	1.5	1.30935	1.57325		2.0301	3.59		0.6222		4.03	6.46215	2.8341	1.22385	3.8412	4.4847	2.2473	5.25005
CaO	42.3504		2.628	32.5714	6.48336	1.4	14.687	3.86715		26.331	6.39		44.1048		7.71	9.81885	3.6783	1.6119	5.3955	6.6132	1.3365	12.7755
Na2O	0.6732		3.096	2.16195	2.68062	2.52	3.11605	1.24845		1.7889	2.16		0.7038		3.84	1.03515	2.82405	2.97505	3.7917	4.3164	1.5642	1.94045
K2O	0.48144		1.2861	0.4263	2.36165	2.188	1.6443	3.39924		1.1256	1.848		0.20706		0.233	1.45122	1.70247	2.81286	1.09989	0.15543	3.58479	1.67352
TiO2	0.12444		0.8055	0.33292	0.606776	0.545	0.528815	0.417165		0.38793	0.893		0.15504		1.433	0.99696	0.91455	0.548245	0.68211	1.53747	0.66924	0.832325
MnO	0.04692		0.1152	0.053795	0.055067	0.042	0.059885	0.03045		0.069345	0.101		0.04284		0.167	0.268335	0.139695	0.056715	0.1386	0.19107	0.06633	0.14972
P2O5	0.0357		0.144	0.061915	0.120524	0.11	0.12789	0.06293		0.07638	0.128		0.03876		0.213	0.1005	0.12864	0.11144	0.10395	0.26136	0.12771	0.16942
LOI	33.53		15.02	26.68	6.52	2.39	12.34	4.6		21.34	4.09		34.43		3.08	5.37	5.3	2.32	4.65	2.26	3.49	7.66
Total	98.5499		100.891	99.3763	99.5063	99.645	99.8898	99.8293		99.6707	99.98		99.4907		99.566	99.4712	99.7107	99.7275	99.4672	99.8116	99.6715	99.8048
Trace Elements
Zn	68.3		107.6	90.7	81.8	62.6	83	69		116.8	111.3		68.1		116.4	143.3	68.3	64.1	105.1	146.9	123.5	109.9
Cu	12.7		39.7	35.6	19.7	17.4	20.2	18.7		38.4	52.1		21.6		207.1	45.7	12.7	10.9	38.6	286.5	61.4	39.1
Ni	22.7		38.5	31.2	23.7	17.7	25	10.9		22.9	30.4		20.9		18.2	60.3	22.7	9.3	35.7	16.6	30.1	50.5
Cr	18.9		121.9	86.4	45	39.5	51	30		42.3	82.8		33.8		13.9	250.7	18.9	27.5	93.5	6.7	127.8	180.3
V	29.2		182.9	135.4	94.6	83.5	97.8	68.5		128.9	223.5		64		519.3	367	29.2	74.4	184.7	470.8	110.6	395.4
Ba	135.2		46.6	37.3	492.7	404.4	342.5	671.5		144.6	207.8		61.5		50.3	961.3	135.2	454.1	154	21.2	302.8	219.7
Sc	23		27.6	31.6	15.3	12.3	18.2	10.6		6.5	28.2		-3.5		39.5	50.1	23	12.8	31.2	41.6	18.3	39.4
La	17.8		5.2	3.5	19.5	19.6	24.5	25.9		11	9.5		3.2		6.6	6.3	17.8	17.9	5.9	1	18.1	29.1
Ce	29.4		8.4	4.7	45.6	43.3	53.4	55.1		28.9	32.6		7		15.5	7.3	29.4	43.1	22.2	18	46.9	10.8
Nd	15.9		9.3	7.4	21.9	21.6	26	23.7		16.4	18.1		6.6		13.6	10	15.9	20.6	13.4	14.1	24.1	7.4
U	0.6		-0.1	0.2	2.1	1.9	1.7	3.3		0.8	0.1		0.1		0.4	0.2	0.6	1.4	n.d.	0.3	0.8	0.4
Th	1.9		1.2	0.4	9.1	8.1	7.2	14.8		6	6.3		-0.7		-0.5	1.9	1.9	6.3	3.4	0	9	n.d.
Pb	7.5		1.8	2.2	13	13.8	7.1	18.1		5.4	11		2.1		2.1	8.1	7.5	10.6	11.8	1.8	15.1	7
Nb	2		1.4	0.8	7.5	7.1	6.3	8.8		4	6.4		0.6		1.5	3.1	3	5.8	3.6	1.3	8.2	1.2
Zr	39.3		42.7	28.5	175.8	161.3	149.9	148.9		69.4	127.7		18.8		78.7	49.5	50.4	157.4	69.9	72.6	137.3	36
Y	10.8		13.8	8.9	22.9	25.5	23.2	26.9		14.3	26.3		5.1		25.7	19.3	19.4	27.7	19.9	21.5	27.3	19.6
Sr	409.2		296	177	181.9	116.2	215.3	77.4		258.7	1112.6		355.9		132.5	193.7	194.5	165.9	299.7	119	389.5	165
Rb	16.3		22.7	9.6	80	76.1	57.7	115.8		35.6	55		6.7		3.7	42.4	42.3	95	30.6	2.5	129.2	53.2
